# Supplementary material for: Functionalization and Coordination Effects on the Structural Chemistry of Pendant Arm Derivatives of 1,4,7-trithia-10-aza-cyclododecane ([12]aneNS3)
Source: MDPI journal article supplement (doi:10.3390/cryst13040616), 2023-04-03
Supplement: s1 [file s1]

# Functionalization and coordination effects on the structural chemistry of pendant arm derivatives of 1-aza-3,7,10-trithiacyclo dodecane ([12]aneNS<sub>3</sub>)

Claudia Caltagirone <sup>1</sup>, Alexander J. Blake <sup>2,\*</sup>, Francesco Demartin <sup>3</sup>, Alessandra Garau <sup>1</sup>, Enrico Podda <sup>4</sup>, Alexandra Pop <sup>5</sup>, Vito Lippolis <sup>1,\*</sup> and Cristian Silvestru <sup>5</sup>

<sup>1</sup> Dipartimento di Scienze Chimiche e Geologiche, Università degli Studi di Cagliari, S.S. 554 Bivio per Sestu, Monserrato (CA), 09042, Italy.

<sup>2</sup> School of Chemistry, University of Nottingham, University Park, Nottingham, NG7 2RD, UK

<sup>3</sup> Dipartimento di Chimica, Università degli Studi di Milano, Milano, 20133, Italy.

<sup>4</sup> Centro Servizi di Ateneo per la Ricerca-CeSAR, Università degli Studi di Cagliari, S.S. 554 Bivio per Sestu, Monserrato (CA), 09042, Italy.

<sup>5</sup> Supramolecular Organic and Organometallic Chemistry Centre, Department of Chemistry, Faculty of Chemistry and Chemical Engineering, Babes-Bolyai University, Str. Arany Janos 11, Cluj-Napoca, 400028, Romania.

\* Correspondence: lippolis@unica.it (V.L.); alexanderjohnblake@outlook.com (A.J.B.)

## SUPPORTING INFORMATION

### Table of contents

**Table S1.** Crystallographic data and structure refinement parameters for **L12**, **L20**, and **L21**·CHCl<sub>3</sub>.

**Table S2.** Selected bond lengths (Å) and angles (°) for **L12**.

**Table S3.** Selected bond lengths (Å) and angles (°) for **L20**.

**Table S4.** Selected bond lengths (Å) and angles (°) for **L21**·CHCl<sub>3</sub>.

**Table S5.** Torsion angles for the [12]aneNS<sub>3</sub> moiety in derivatives of the macrocycle reported in the Cambridge Structural Database (CSD). Dark green regions represent corners according to the Dale convention.

**Figure S1.** Partial view along the (100) direction of the crystal packing in **L12** showing the slipped  $\pi$ - $\pi$  stacking interactions of adjacent dimers: Centroid-centroid distance = 3.77 Å, shift distance = 1.42 Å.

**Figure S2.** Pictorial representation of the conformations assumed by the [12]aneNS<sub>3</sub> moieties in crystallographically-characterized derivatives of the macrocycle with corners depicted as full circles.

**Table S1** Crystallographic data and structure refinement parameters for **L12**, **L20**, and **L21·CHCl<sub>3</sub>**.

| Compound                                    | <b>L12</b>                                                                     | <b>L20</b>                                                    | <b>L21·CHCl<sub>3</sub></b>                                                                  |
|---------------------------------------------|--------------------------------------------------------------------------------|---------------------------------------------------------------|----------------------------------------------------------------------------------------------|
| Empirical formula                           | C <sub>18</sub> H <sub>23</sub> ClN <sub>2</sub> O <sub>3</sub> S <sub>3</sub> | C <sub>15</sub> H <sub>22</sub> BrNS <sub>3</sub>             | C <sub>16</sub> H <sub>23</sub> Cl <sub>3</sub> N <sub>2</sub> O <sub>3</sub> S <sub>3</sub> |
| Formula weight                              | 415.01                                                                         | 392.42                                                        | 493.89                                                                                       |
| Temperature/K                               | 150(2)                                                                         | 293(2)                                                        | 293(2)                                                                                       |
| Crystal system                              | triclinic                                                                      | triclinic                                                     | triclinic                                                                                    |
| Space group                                 | <i>P</i> -1                                                                    | <i>P</i> -1                                                   | <i>P</i> -1                                                                                  |
| a/Å                                         | 8.4811(6)                                                                      | 8.0769(6)                                                     | 8.5163(9)                                                                                    |
| b/Å                                         | 9.8093(7)                                                                      | 8.5225(6)                                                     | 9.5058(10)                                                                                   |
| c/Å                                         | 11.8739(9)                                                                     | 12.5476(9)                                                    | 14.5582(15)                                                                                  |
| α/°                                         | 99.469(2)                                                                      | 99.941(6)                                                     | 73.290(10)                                                                                   |
| β/°                                         | 99.016(2)                                                                      | 96.608(6)                                                     | 89.590(10)                                                                                   |
| γ/°                                         | 93.623(2)                                                                      | 93.121(6)                                                     | 85.960(10)                                                                                   |
| Volume/Å <sup>3</sup>                       | 958.31(12)                                                                     | 842.65(11)                                                    | 1125.9(2)                                                                                    |
| Z                                           | 2                                                                              | 2                                                             | 2                                                                                            |
| ρ <sub>calc</sub> /cm <sup>3</sup>          | 1.438                                                                          | 1.547                                                         | 1.457                                                                                        |
| μ/mm <sup>-1</sup>                          | 0.536                                                                          | 2.801                                                         | 0.704                                                                                        |
| F(000)                                      | 436.0                                                                          | 404.0                                                         | 512.0                                                                                        |
| Crystal size/mm <sup>3</sup>                | 0.98 × 0.9 × 0.59                                                              | 0.53 × 0.41 × 0.07                                            | 0.21 × 0.09 × 0.07                                                                           |
| Radiation                                   | Mo Kα (λ = 0.71073)                                                            | Mo Kα (λ = 0.71073)                                           | Mo Kα (λ = 0.71073)                                                                          |
| 2θ range for data collection/°              | 4.228 to 54.948                                                                | 6.37 to 53.752                                                | 4.486 to 56.084                                                                              |
| Index ranges                                | -10 ≤ h ≤ 10, -12 ≤ k ≤ 12, -15 ≤ l ≤ 15                                       | -9 ≤ h ≤ 9, -8 ≤ k ≤ 10, -15 ≤ l ≤ 14                         | -11 ≤ h ≤ 10, -12 ≤ k ≤ 12, -19 ≤ l ≤ 19                                                     |
| Reflections collected                       | 8758                                                                           | 4265                                                          | 10525                                                                                        |
| Independent reflections                     | 4271 [R <sub>int</sub> = 0.036, R <sub>sigma</sub> = 0.021]                    | 3181 [R <sub>int</sub> = 0.0182, R <sub>sigma</sub> = 0.0432] | 4989 [R <sub>int</sub> = 0.0275, R <sub>sigma</sub> = 0.0412]                                |
| Data/restraints/parameters                  | 4271/0/228                                                                     | 3181/0/181                                                    | 4989/3/273                                                                                   |
| Goodness-of-fit on F <sup>2</sup>           | 1.066                                                                          | 1.047                                                         | 1.069                                                                                        |
| Final R indexes [I ≥ 2σ (I)]                | R <sub>1</sub> = 0.0295, wR <sub>2</sub> = 0.0775                              | R <sub>1</sub> = 0.0352, wR <sub>2</sub> = 0.0687             | R <sub>1</sub> = 0.0489, wR <sub>2</sub> = 0.1326                                            |
| Final R indexes [all data]                  | R <sub>1</sub> = 0.0338, wR <sub>2</sub> = 0.0793                              | R <sub>1</sub> = 0.0470, wR <sub>2</sub> = 0.0753             | R <sub>1</sub> = 0.0751, wR <sub>2</sub> = 0.1428                                            |
| Largest diff. peak/hole / e Å <sup>-3</sup> | 0.38/−0.24                                                                     | 0.34/−0.61                                                    | 0.31/−0.38                                                                                   |

**Table S2.** Selected bond lengths (Å) and angles (°) for **L12**.

|             |            |              |            |
|-------------|------------|--------------|------------|
| N1–C2       | 1.4717(18) | C5–C6        | 1.521(2)   |
| N1–C12      | 1.4719(17) | C8–C9        | 1.518(2)   |
| N1–C13      | 1.4697(18) | C11–C12      | 1.536(2)   |
| N23–C18     | 1.3676(18) | C13–C14      | 1.5085(19) |
| N23–C22     | 1.3190(19) | C14–C15      | 1.4175(19) |
| O24–C19     | 1.3592(16) | C14–C19      | 1.3787(19) |
| S4–C3       | 1.8137(16) | C15–C16      | 1.361(2)   |
| S4–C5       | 1.8089(16) | C16–C17      | 1.4177(19) |
| S7–C6       | 1.8156(16) | C17–C18      | 1.4217(18) |
| S7–C8       | 1.8125(16) | C17–C20      | 1.4082(19) |
| S10–C9      | 1.8166(16) | C18–C19      | 1.4206(19) |
| S10–C11     | 1.8132(15) | C20–C21      | 1.366(2)   |
| Cl25–C16    | 1.7460(14) | C21–C22      | 1.408(2)   |
| C2–C3       | 1.522(2)   | C19–C14–C13  | 120.93(12) |
| C12–N1–C2   | 113.65(11) | C19–C14–C15  | 118.84(12) |
| C13–N1–C2   | 111.20(11) | C16–C15–C14  | 120.90(13) |
| C13–N1–C12  | 110.18(11) | C15–C16–Cl25 | 119.49(11) |
| C22–N23–C18 | 117.59(12) | C15–C16–C17  | 121.89(12) |
| C5–S4–C3    | 101.03(7)  | C17–C16–Cl25 | 118.62(10) |
| C8–S7–C6    | 100.60(7)  | C16–C17–C18  | 117.52(12) |
| C11–S10–C9  | 101.05(7)  | C20–C17–C16  | 125.28(12) |
| N1–C2–C3    | 112.52(12) | C20–C17–C18  | 117.20(12) |
| C2–C3–S4    | 112.68(11) | N23–C18–C17  | 122.55(12) |
| C6–C5–S4    | 112.75(11) | N23–C18–C19  | 117.69(12) |
| C5–C6–S7    | 113.71(11) | C19–C18–C17  | 119.75(12) |
| C9–C8–S7    | 114.27(11) | O24–C19–C14  | 119.20(12) |
| C8–C9–S10   | 113.18(11) | O24–C19–C18  | 119.74(12) |
| C12–C11–S10 | 113.57(10) | C14–C19–C18  | 121.05(12) |
| N1–C12–C11  | 116.02(12) | C21–C20–C17  | 119.94(13) |
| N1–C13–C14  | 112.71(11) | C20–C21–C22  | 118.65(14) |
| C15–C14–C13 | 120.20(12) | N23–C22–C21  | 124.05(14) |

**Table S3.** Selected bond lengths (Å) and angles (°) for **L20**.

|             |            |              |            |
|-------------|------------|--------------|------------|
| Br20–C19    | 1.895(3)   | N1–C2        | 1.462(3)   |
| S4–C5       | 1.803(3)   | N1–C13       | 1.471(3)   |
| S4–C3       | 1.811(3)   | C2–C3        | 1.517(3)   |
| C5–C6       | 1.516(4)   | C13–C14      | 1.499(3)   |
| C6–C7       | 1.810(3)   | C14–C15      | 1.387(4)   |
| S7–C8       | 1.813(3)   | C14–C19      | 1.400(4)   |
| C8–C9       | 1.506(4)   | C15–C16      | 1.375(4)   |
| C9–S10      | 1.805(3)   | C16–C17      | 1.370(4)   |
| S10–C11     | 1.810(3)   | C17–C18      | 1.371(4)   |
| C11–C12     | 1.516(4)   | C18–C19      | 1.375(4)   |
| C12–N1      | 1.468(3)   | N1–C2–C3     | 111.5(2)   |
| C5–S4–C3    | 101.04(13) | C2–C3–S4     | 114.86(18) |
| C6–C5–S4    | 114.28(19) | N1–C13–C14   | 113.4(2)   |
| C5–C6–S7    | 114.11(19) | C15–C14–C13  | 120.5(2)   |
| C6–S7–C8    | 101.20(13) | C15–C14–C19  | 116.5(3)   |
| C9–C8–S7    | 115.64(19) | C19–C14–C13  | 123.0(2)   |
| C8–C9–S10   | 113.31(19) | C16–C15–C14  | 122.1(3)   |
| C9–S10–C11  | 102.40(13) | C17–C16–C15  | 119.8(3)   |
| C12–C11–S10 | 114.8(2)   | C16–C17–C18  | 120.0(3)   |
| N1–C12–C11  | 114.4(2)   | C17–C18–C19  | 120.1(3)   |
| C12–N1–C13  | 111.1(2)   | C14–C19–Br20 | 120.2(2)   |
| C2–N1–C12   | 111.5(2)   | C18–C19–Br20 | 118.3(2)   |
| C2–N1–C13   | 110.7(2)   | C18–C19–C14  | 121.5(3)   |

**Table S4.** Selected bond lengths (Å) and angles (°) for **L21**·CHCl<sub>3</sub>.

|             |            |             |            |
|-------------|------------|-------------|------------|
| C2–C3       | 1.510(3)   | C13–C14     | 1.514(3)   |
| C2–N1       | 1.478(3)   | C13–N1      | 1.479(3)   |
| C3–S4       | 1.813(3)   | C14–C15     | 1.403(3)   |
| C5–C6       | 1.510(3)   | C14–C19     | 1.377(3)   |
| C5–S4       | 1.811(2)   | C15–C16     | 1.390(3)   |
| C6–S7       | 1.810(2)   | C15–O20     | 1.344(3)   |
| C8–C9       | 1.522(4)   | C16–C17     | 1.369(4)   |
| C8–S7       | 1.808(3)   | C17–C18     | 1.375(4)   |
| C9–S10      | 1.816(3)   | C18–C19     | 1.385(3)   |
| C11–C12     | 1.527(3)   | C18–N21     | 1.466(3)   |
| C11–S10     | 1.808(3)   | N21–O22     | 1.215(3)   |
| C12–N1      | 1.479(3)   | N21–O23     | 1.211(3)   |
| N1–C2–C3    | 112.39(19) | C17–C16–C15 | 120.8(2)   |
| C2–C3–S4    | 112.82(17) | C16–C17–C18 | 118.4(2)   |
| C6–C5–S4    | 113.07(18) | C17–C18–C19 | 122.0(2)   |
| C5–C6–S7    | 114.25(18) | C17–C18–N21 | 119.2(2)   |
| C9–C8–S7    | 114.3(2)   | C19–C18–N21 | 118.8(2)   |
| C8–C9–S10   | 113.0(2)   | C14–C19–C18 | 119.9(2)   |
| C12–C11–S10 | 112.81(19) | C2–N1–C12   | 114.18(17) |
| N1–C12–C11  | 116.1(2)   | C2–N1–C13   | 110.35(18) |
| N1–C13–C14  | 111.30(18) | C12–N1–C13  | 112.18(18) |
| C15–C14–C13 | 120.4(2)   | O22–N21–C18 | 118.7(3)   |
| C19–C14–C13 | 121.1(2)   | O23–N21–C18 | 118.4(3)   |
| C19–C14–C15 | 118.4(2)   | O23–N21–O22 | 122.9(3)   |
| C16–C15–C14 | 120.3(2)   | C5–S4–C3    | 99.95(11)  |
| O20–C15–C14 | 120.7(2)   | C8–S7–C6    | 102.18(12) |
| O20–C15–C16 | 119.0(2)   | C11–S10–C9  | 101.14(12) |

**Table S5.** Conformational study with data retrieved from the [12]aneNS<sub>3</sub> derivatives reported in the Cambridge Structural Database (CSD). Consecutive dark green regions identify corners according to the Dale convention (see Figures S2 and 6 in the main text).

| Refcode  | Fragment | N1-C2-C3-S4 | C2-C3-S4-C5 | C3-S4-C5-C6 | S4-C5-C6-S7 | C5-C6-S7-C8 | C6-S7-C8-C9 | S7-C8-C9-S10 | C8-C9-S10-C11 | C9-S10-C11-C12 | S10-C11-C12-N1 | C11-C12-N1-C2 | C12-N1-C2-C3 | Dale's notation |
|----------|----------|-------------|-------------|-------------|-------------|-------------|-------------|--------------|---------------|----------------|----------------|---------------|--------------|-----------------|
| BEYFUH   | 1        | -52,7       | -61,6       | 92,3        | 52,1        | -169,1      | 64,1        | 58,3         | -144,7        | 64,3           | 59,5           | -177,1        | 160,9        | [11334]         |
|          | 2        | -55,4       | -62,5       | 87,3        | 58,2        | -173,0      | 66,6        | 57,4         | -145,3        | 61,2           | 59,6           | -172,7        | 165,4        | [11334]         |
|          | 3        | 62,2        | -142,4      | 61,7        | 63,6        | -154,5      | 155,0       | -63,3        | -62,9         | 88,1           | 53,1           | 171,7         | 75,5         | [34113]         |
| DAVHEO   | 1        | -51,8       | -77,5       | 151,9       | -60,4       | -71,0       | 157,0       | -52,8        | -81,8         | 145,5          | -65,1          | -75,2         | 163,5        | [3333]          |
|          | 2        | 71,4        | -150,0      | 70,0        | 62,7        | -165,8      | 67,0        | 66,5         | -153,2        | 75,0           | 55,2           | -173,8        | 72,9         | [3333]          |
| DEDXIU   | 1        | 48,0        | 75,1        | -113,7      | 79,3        | -158,9      | 130,6       | -68,1        | 126,5         | -72,6          | -54,0          | 167,6         | -174,7       | [84]            |
| DEGREP   | 1        | 62,3        | 71,7        | -150,2      | 60,7        | 65,5        | -171,7      | 69,2         | 69,4          | -144,1         | 67,9           | 74,0          | 178,4        | [3333]          |
| DEGREP01 | 1        | 62,1        | 71,5        | -149,7      | 60,2        | 66,9        | -171,2      | 67,0         | 71,5          | -144,0         | 66,8           | 75,4          | 179,1        | [3333]          |
| DEGRDZ   | 1        | 61,4        | 73,4        | -148,1      | 63,2        | 62,7        | -172,9      | 67,8         | 71,5          | -143,1         | 66,6           | 71,7          | 175,8        | [3333]          |
| GADMON   | 1        | -163,0      | 91,8        | -84,1       | 171,6       | -75,5       | -76,1       | 163,6        | -74,1         | -73,3          | 165,4          | -89,6         | 100,6        | [3333]          |
|          | 2        | -168,7      | 64,7        | 68,3        | -168,8      | 72,7        | 74,4        | -175,7       | 69,0          | 65,1           | -165,5         | 78,3          | 77,7         | [3333]          |
| GIHKQZ   | 1        | 74,2        | -139,1      | 72,6        | 60,2        | -175,3      | 57,5        | 68,6         | -143,7        | 79,6           | 48,2           | -176,6        | 69,1         | [3333]          |
| MAPYOV   | 1        | 168,5       | -76,4       | -78,5       | 172,7       | -64,2       | -64,2       | 173,3        | -77,1         | -74,4          | 166,5          | -66,3         | -69,1        | [3333]          |
| MAPZAI   | 1        | 58,8        | 70,2        | -168,5      | 65,2        | 69,1        | -152,4      | 64,8         | 68,4          | -162,4         | 69,1           | 75,5          | -164,1       | [3333]          |
|          | 2        | 66,8        | -161,9      | 65,3        | 67,7        | -154,4      | 70,0        | 64,3         | -166,1        | 68,2           | 58,0           | -165,4        | 81,0         | [3333]          |
| MAPZIQ   | 1        | -52,7       | -79,5       | 152,1       | -65,3       | -62,6       | 167,3       | -62,0        | -74,5         | 149,6          | -65,9          | -76,3         | 174,1        | [3333]          |
|          | 2        | 61,3        | -142,2      | 66,0        | 61,9        | -158,5      | 149,9       | -62,2        | -59,4         | 99,7           | 45,0           | 177,8         | 68,1         | [34113]         |
| MEXBOG   | 1        | -53,7       | -78,1       | 127,7       | -73,6       | 153,6       | -149,2      | 67,0         | -123,0        | 79,2           | 52,4           | -168,0        | 169,0        | [84]            |
|          | 2        | -57,4       | -77,7       | 117,1       | -62,6       | 148,6       | -152,0      | 71,0         | -123,4        | 76,3           | 54,7           | -168,5        | 168,0        | [84]            |
| MEXCAT   | 1        | -72,3       | 159,2       | -76,5       | -62,8       | 151,3       | -63,4       | -68,2        | 162,7         | -75,3          | -56,2          | 164,7         | -73,3        | [3333]          |
| NEGBIL   | 1        | 163,0       | -70,3       | -78,2       | 170,7       | -102,8      | 90,3        | -165,1       | 84,1          | 81,1           | -158,3         | 91,6          | -102,5       | [3333]          |
| ODDFAQ   | 1        | -57,4       | -71,6       | 175,7       | -62,1       | -67,6       | 145,6       | -64,5        | -72,7         | 170,9          | -63,0          | -79,2         | 158,8        | [3333]          |
| ODOFEU   | 1        | -56,8       | -65,1       | 149,8       | -54,4       | -71,8       | 170,2       | -53,8        | -90,0         | 70,4           | 56,0           | -166,2        | 163,4        | [33114]         |
| PIYPAP   | 1        | 52,9        | 71,5        | -165,1      | 66,0        | 68,9        | -158,3      | 64,7         | 67,4          | -158,8         | 70,2           | 80,6          | -166,7       | [3333]          |
| PIYPET   | 1        | -69,9       | 159,6       | -66,5       | -64,7       | 156,2       | -71,0       | -64,7        | 163,6         | -69,7          | -53,9          | 164,4         | -81,4        | [3333]          |
| PIYPIX   | 1        | -53,2       | -70,0       | 164,2       | -64,8       | -72,6       | 154,2       | -63,6        | -67,2         | 158,3          | -67,3          | -83,2         | 163,4        | [3333]          |
|          | 2        | 69,3        | -160,0      | 68,2        | 63,7        | -155,5      | 71,7        | 63,5         | -162,7        | 70,0           | 55,0           | -164,1        | 80,4         | [3333]          |
| PIYPOD   | 1        | -65,9       | 164,6       | -71,3       | -69,4       | 151,6       | -69,7       | -64,0        | 170,2         | -68,7          | -56,3          | 162,3         | -75,0        | [3333]          |
| PIYPUJ   | 1        | 57,5        | 70,0        | -164,1      | 64,1        | 71,7        | -155,1      | 62,6         | 68,7          | -160,9         | 69,3           | 77,7          | -166,4       | [3333]          |
|          | 2        | -69,4       | 163,8       | -62,2       | -65,2       | 156,4       | -75,9       | -61,9        | 165,6         | -67,6          | -59,1          | 163,9         | -79,3        | [3333]          |
|          | 3        | -68,4       | 157,7       | -68,0       | -64,5       | 161,0       | -71,4       | -63,4        | 161,3         | -70,7          | -58,0          | 168,5         | -77,9        | [3333]          |
| PIYQAQ   | 1        | 67,4        | -153,8      | 72,5        | 57,9        | -152,7      | 72,0        | 66,7         | -163,2        | 70,8           | 57,6           | -166,3        | 78,1         | [3333]          |
| TECYUW   | 1        | 60,5        | 74,9        | -162,0      | 65,9        | 64,5        | -157,8      | 65,5         | 70,6          | -157,9         | 70,5           | 69,0          | -166,5       | [3333]          |
| TECZEH   | 1        | 65,2        | -158,1      | 68,7        | 68,5        | -157,4      | 64,8        | 65,0         | -162,7        | 71,7           | 63,9           | -167,8        | 74,0         | [3333]          |
| WERSOC   | 1        | -168,0      | 64,5        | 65,2        | -172,6      | 73,9        | 72,2        | -173,0       | 72,4          | 66,1           | -163,8         | 71,6          | 82,8         | [3333]          |
|          | 2        | 166,9       | -63,7       | -68,0       | 172,7       | -77,0       | -73,0       | 170,1        | -64,5         | -72,1          | 167,3          | -70,6         | -79,1        | [3333]          |
| WERSUI   | 1        | -169,4      | 71,8        | 67,9        | -170,6      | 72,3        | 73,2        | -173,1       | 66,5          | 68,3           | -165,9         | 79,8          | 67,7         | [3333]          |
| WERTOD   | 1        | 70,1        | -154,4      | 65,7        | 65,1        | -161,1      | 71,8        | 59,9         | -158,3        | 75,2           | 56,5           | -173,3        | 77,1         | [3333]          |
| ZEZSI    | 1        | -48,6       | -94,0       | 85,2        | -81,6       | 159,5       | -155,9      | 51,1         | 47,4          | -165,0         | 100,9          | -64,1         | 164,9        | [11433]         |
| ZINHUC   | 1        | 69,3        | -152,5      | 67,0        | 67,2        | -162,3      | 68,5        | 64,9         | -155,1        | 67,0           | 58,9           | -174,9        | 79,5         | [3333]          |
| ZINJAK   | 1        | -48,2       | -74,8       | 152,1       | -67,5       | -66,3       | 169,3       | -61,7        | -67,7         | 146,0          | -74,1          | -77,8         | 173,1        | [3333]          |
| ZINJEO   | 1        | -51,4       | -74,6       | 155,6       | -66,4       | -66,5       | 166,1       | -61,7        | -70,9         | 148,6          | -73,6          | -75,4         | 171,2        | [3333]          |
|          | 2        | -51,7       | -64,3       | 164,6       | -64,8       | -87,5       | 88,6        | 42,4         | -130,6        | 143,7          | -69,9          | -77,3         | 168,9        | [31143]         |

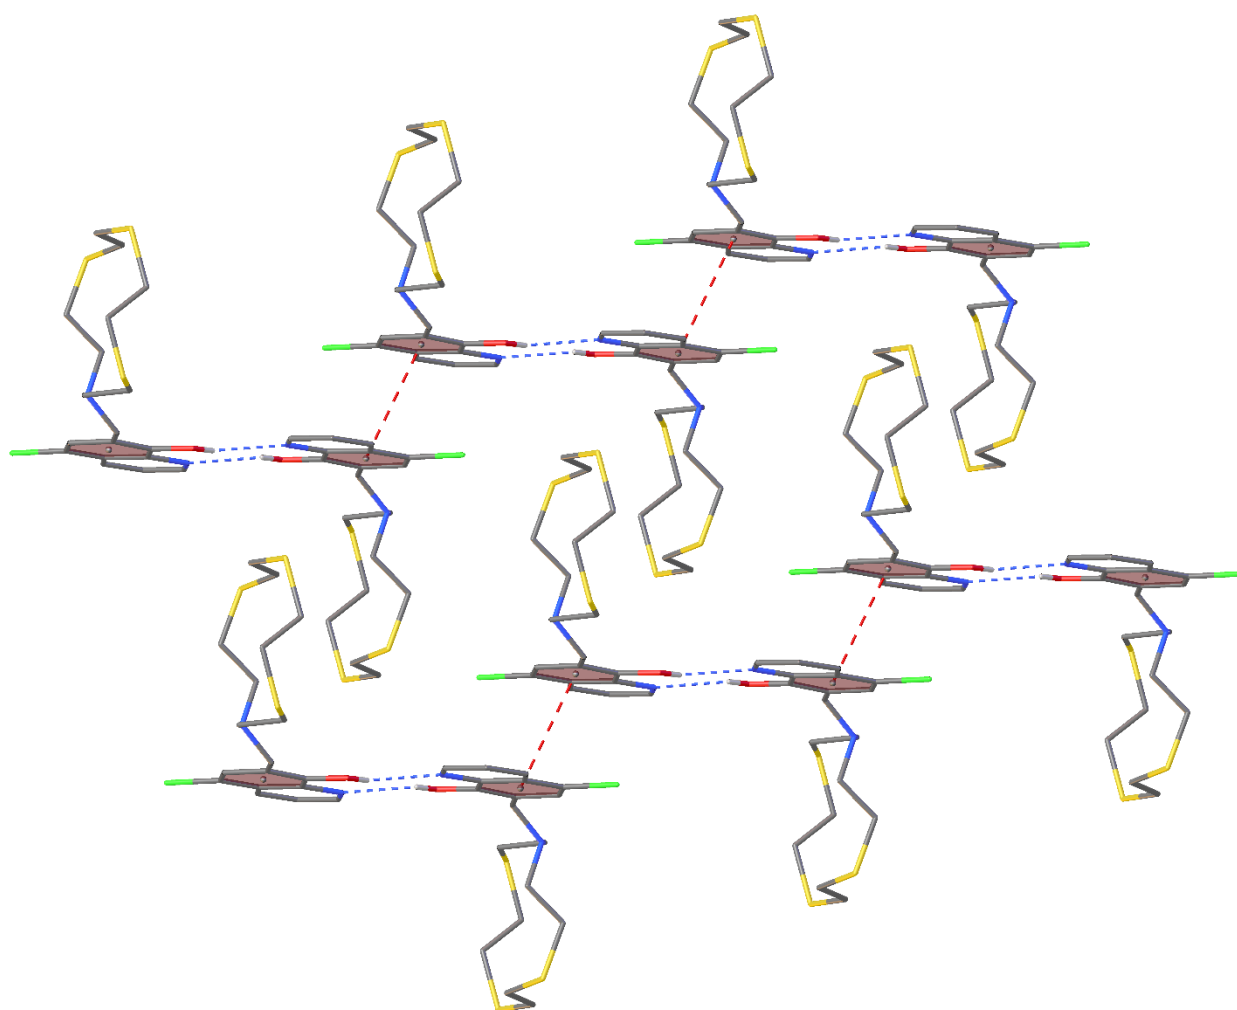

**Figure S1.** Partial view along the (100) direction of the crystal packing in **L12** showing the slipped  $\pi$ - $\pi$  stacking interactions of adjacent dimers: centroid-centroid distance = 3.77 Å, shift distance = 1.42 Å.

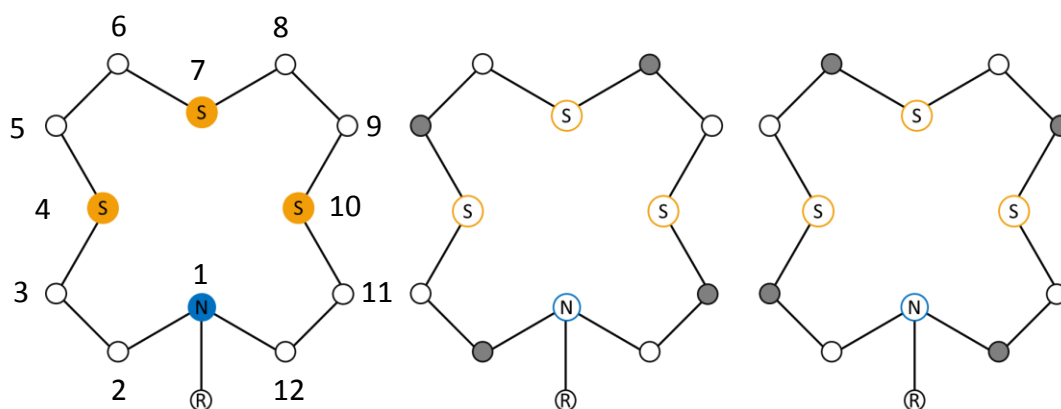

**[3333]**

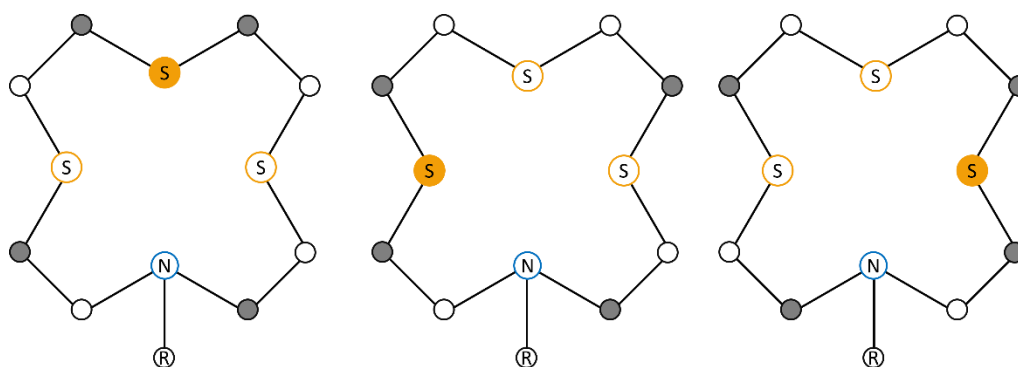

**[31143]**

**[11433]**

**[34113]**

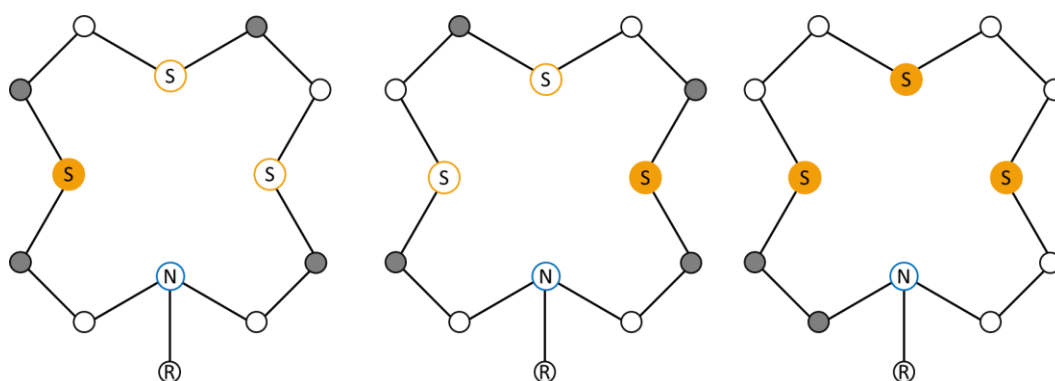

**[11334]**

**[33114]**

**[11334]**

**Figure S2.** Pictorial representation of the conformations assumed by the [12]aneNS<sub>3</sub> moieties in crystallographically-characterized derivatives of the macrocycle with corners depicted as full circles and numbering scheme adopted. The reported Dale notation has been assigned by counting the number of bonds between each pair of corners starting from the first corner to the left of the N atom as shown in the Figure and proceeding clockwise. For the two couples of conformations [11433]/[34113] and [11334]/[33114] the same Dale notations, [11433] and [11334], respectively, would be obtained if the count of bonds between each pair of corners starts from the first corner to the right of the N atom and proceeds anti-clockwise.
